# Supplementary material
Source: publisher site journal article supplement (https://www.dovepress.com/get_supplementary_file.php?f=295252.docx)
Supplement: Supplementary file 1 [file get_supplementary_file.php]

Methods

**Online Figure Ι. Flowchart of study profiles**

**

**

**Results**

**Subgroup analyses on the association of first IS with HDL-C, stratified by baseline variables**

Online Table Ι reveals that none of the baseline variables showed effect modification of the associations between HDL-C and IS after the stratified analyses.

**Online Table Ι. Association of First IS with HDL-C Stratified by Baseline Variables.**

|  | **N** | **Events (%)** | **OR (95%CI)** | ***P value*** | ***P  for interaction*** |
| --- | --- | --- | --- | --- | --- |
|
| **Sex** |  |  |  |  | 0·565 |
| Male | 2220 | 1110 (50·0) | 0·87 (0·79,0·96) | 0·006 |  |
| Female | 2706 | 1353 (50·0) | 0·92 (0·83,1·01) | 0·080 |  |
| **Age, yr, median cut-off** |  |  |  |  | 0·874 |
| <68 | 2463 | 1232 (50·0) | 0·91 (0·82,1·00) | 0·062 |  |
| ≥68 | 2463 | 1231 (50·0) | 0·88 (0·80,0·98) | 0·014 |  |
| **SBP, mmHg** |  |  |  |  | 0·526 |
| <140 | 1473 | 636 (43·2) | 0·88 (0·77,1·01) | 0·064 |  |
| ≥140 | 3448 | 1825 (52·9) | 0·91 (0·84,0·99) | 0·024 |  |
| **BMI, kg/m2** |  |  |  |  | 0·196 |
| <24 | 1630 | 745 (45·7) | 0·82 (0·73,0·91) | <0·001 |  |
| ≥24 | 3273 | 1705 (52·1) | 0·94 (0·86,1·03) | 0·190 |  |
| **Fasting glucose, mmol/L** |  |  |  |  | 0·725 |
| <5·6 | 2341 | 1074 (45·9) | 0·90 (0·82,1·00) | 0·049 |  |
| ≥5·6 | 2585 | 1389 (53·7) | 0·89 (0·80,0·97) | 0·013 |  |
| **Smoking status** |  |  |  |  | 0·385 |
| Never | 3540 | 1754 (49·5) | 0·91 (0·84,0·99) | 0·029 |  |
| Ever | 1386 | 709 (51·2) | 0·85 (0·74,0·96) | 0·012 |  |
| **Alcohol consumption** |  |  |  |  | 0·917 |
| Never | 3634 | 1849 (50·9) | 0·89 (0·82,0·97) | 0·009 |  |
| Ever | 1290 | 612 (47·4) | 0·88 (0·78,0·99) | 0·036 |  |
| **Total homocysteine, μmol/L** |  |  |  |  | 0·371 |
| <15 | 3689 | 1786 (48·4) | 0·90 (0·83,0·98) | 0·014 |  |
| ≥15 | 1233 | 675 (54·7) | 0·89 (0·78,1·01) | 0·061 |  |
| **TC, mg/dL** |  |  |  |  | 0·214 |
| <200 | 2077 | 1034 (49·8) | 0·93 (0·82,1·07) | 0·309 |  |
| ≥200 | 2849 | 1429 (50·2) | 0·89 (0·81,0·97) | 0·008 |  |
| **TG, mg/dL** |  |  |  |  | 0·952 |
| <150 | 3480 | 1666 (47·9) | 0·88 (0·81,0·95) | <0·001 |  |
| ≥150 | 1446 | 797 (55·1) | 0·91 (0·78,1·06) | 0·207 |  |
| **LDL-C, mg/dL** |  |  |  |  | 0·313 |
| <130 | 2825 | 1365 (48·3) | 0·89 (0·82,0·98) | 0·015 |  |
| ≥130 | 2101 | 1098 (52·3) | 0·89 (0·80,0·98) | 0·021 |  |

Adjusted, if not stratified, for age, sex, body mass index (BMI), systolic blood pressure (SBP), diastolic blood pressure (DBP), fasting glucose, smoking status, alcohol drinking, antihypertensive drugs, glucose lowering drugs, total homocysteine (tHcy), estimated glomerular filtration rate (eGFR), LDL-C and TG.
